# Supplementary material for: The impact of community-based health insurance on the utilization of medically trained healthcare providers among informal workers in Bangladesh
Source: PubMed Central journal article supplement (PMC6040718; doi:10.1371/journal.pone.0200265), 2018-07-11
Supplement: pone.0200265.s004.pdf [file pone.0200265.s004.pdf]

## Section 1B: Consent form

**Study title: Self-financed health scheme of labour cooperative for accessing quality healthcare of informal sector workers – An implementation research on an existing cooperative for social protection.**

**Principal Investigator (PI):** Dr. Jahangir A.M. Khan

**Organization:** icddr,b

**Questionnaire ID:**

**গবেষণার উদ্দেশ্য:**

আসসালামু আলাইকুম / আদাব। আমি (তথ্য সংগ্রহকারীর নাম) ----- আইসিডিডিআর, বি (কলেরা হাসপাতাল) নামক আন্তর্জাতিক একটি গবেষণা প্রতিষ্ঠান হতে এসেছি। আমরা এই এলাকায় অনৈয়মিক শ্রমিকদের জন্য সমবায় সমিতির মাধ্যমে কিভাবে টেকসই মানসম্মত স্বাস্থ্যসেবা দেয়া যায় সে সম্পর্কিত একটি গবেষণা পরিচালনা করছি। আমাদের এই গবেষণার উদ্দেশ্য হল যে অনৈয়মিক শ্রমিকদের নিজস্ব অর্থায়নে সমিতির মাধ্যমে স্বাস্থ্যসেবার সুযোগ এবং এর উপযুক্ত ব্যবহার নিশ্চিত করা যায় এ সম্পর্কিত প্রকল্পটির মূল্যায়ন করা, স্বাস্থ্যসেবা নিতে নিজের কত টাকা ব্যয় হয় তা নির্ণয় করা। এই জন্য আমরা আপনাকে আপনার আয়, স্বাস্থ্যসেবার সুযোগ এবং এর উপযুক্ত ব্যবহার, স্বাস্থ্যসেবা নিতে নিজের কত টাকা ব্যয় হয় এবং কিভাবে এই অর্থের যোগান হয় সে সম্পর্কিত কিছু প্রশ্নাবলী জিজ্ঞেস করবো।

**আপনাকে কেন এই গবেষণায় অন্তর্ভুক্ত করা হলো?**

যেহেতু এখানে আমাদের প্রকল্পটি চালু আছে এবং যাঁ নডোম নমুনা নির্বাচন প্রক্রিয়ায় আপনি নির্বাচিত হয়েছেন, সেহেতু আপনাকে এই গবেষণায় একজন উত্তরদাতা হিসাবে নির্বাচিত করা হয়েছে।

**পদ্ধতি:**

আপনি যদি আমাদের এই গবেষণায় অংশ নিতে আগ্রহী হন তবে ৫০ মিনিট স্থায়ী আপনার একটি সাক্ষাতকার নিব। এই সাক্ষাতকারে আমি আপনাকে আপনার আয় এবং এ প্রকল্পে সেবা গ্রহণে আপনার প্রদেয় সময় ও খরচ সম্পর্কিত বিষয়ে কিছু প্রশ্ন করবো। আপনি আপনার পছন্দনীয় স্থানে আপনি সাক্ষাতকার প্রদান করতে পারেন। আপনি চাইলে এখনি সাক্ষাতকার প্রদান করতে পারেন অথবা আপনার সুবিধাজনক সময়ে আমরা পুনরায় আসতে পারি।

**তথ্যের গোপনীয়তা ও নিরাপত্তা**

আপনার দেওয়া সকল তথ্যের গোপনীয়তা দৃঢ়ভাবে রক্ষা করা হবে। আমরা আরও আশ্বস্ত করতে চাই যে, সাক্ষাত প্রদানকারীর প্রদেয় সব তথ্য, ধারণকৃত তথ্যাবলী কাগজপত্র পাঁচ বছরের জন্য নিরাপদ ও গোপনে রাখা হবে যা কেবল মাত্র এই গবেষণায় ব্যবহার করা হবে। আপনার নাম এবং এমন কোন তথ্য যা আপনাকে সনাক্ত করতে পারে তা ভবিষ্যত গবেষণা প্রকাশনা হতে বাদ দেয়া হবে। তাই এটা কোন ক্রমেই সনাক্ত করা সম্ভব নয় যে এটা আপনার দেয়া উত্তর।

**ভবিষ্যতে তথ্যের ব্যবহার**

আপনার দেয়া তথ্য শুধু এই গবেষণার কাজে ব্যবহৃত হবে এবং গবেষণার ফলাফল প্রকাশের সময় আপনার নাম কোনভাবেই প্রকাশ করা হবে না।

**ঝুঁকি**

এই গবেষণায় অংশ গ্রহণ করলে আপনি কোন শারীরিক বা সামাজিক ঝুঁকির সম্মুখীন হবেন না। এই গবেষণায় অংশ গ্রহণ করতে রাজি না হলেও আপনি বা আপনার পরিবার কোন ধরনের সমস্যার সম্মুখীন হবে না।

**লাভ**

এই গবেষণায় অংশ গ্রহণের মাধ্যমে আপনি সরাসরি কোন লাভবান হবেন না কিন্তু ভবিষ্যতে প্রকল্পটির উপযোগীতা ও সেবার গুণগত মান বৃদ্ধিতে সাহায্য করবে।

**গবেষণায় অংশ না নেওয়া এবং বর্জনের অধিকার**

এই গবেষণায় অংশগ্রহণ সম্পূর্ণ আপনার ঐচ্ছিক। যে কোন প্রশ্নের উত্তর না দেওয়া সম্পূর্ণ আপনার ইচ্ছাধীন। সাক্ষাতকারের যে কোন পর্যায়ে আপনি নিজেকে প্রত্যাহার করতে পারবেন।

**ক্ষতিপূরণ:**

এই গবেষণা সম্বন্ধে আপনার কোন প্রশ্ন থাকলে আপনি গবেষণা কর্মীর কাছ থেকে জানতে পারবেন। আপনি প্রধান গবেষক অথবা আই, আর, বি, কো-অর্ডিনেটরের সাথেও নিজে দেওয়া ঠিকানায় যোগাযোগ করতে পারবেন।

**ডঃ জাহাঙ্গীর এ.এম. খান**

প্রধান গবেষক

আইসিডিডিআর, বি

মহাখালি, ঢাকা-১২১২

ফোন - ০২-৮৮৬০৫২৩-৩২ Ext : ২৫৩১

অথবা ০২-৮৮১১১৫৫ (সরাসরি)

Email: jahangir.khan@icddr.org

**এম. এ. সালাম খান**

আই. আর. বি. কো-অর্ডিনেটর

রিসার্চ এডমিনিস্ট্রেশন

আইসিডিডিআর, বি

মহাখালি, ঢাকা-১২১২

ফোন - ০২-৮৮৬০৫২৩-৩২ Ext : ৩২০৬

Email: salamk@icddr.org

আপনি কি এই গবেষণায় অংশ গ্রহণে রাজী?  হ্যাঁ  না

সাক্ষাতকার প্রদানকারীর স্বাক্ষর অথবা টিপ সহি \_\_\_\_\_ তারিখ \_\_\_\_\_

সাক্ষাতকার গ্রহণকারীর স্বাক্ষর \_\_\_\_\_ তারিখ \_\_\_\_\_

| Section 2 : সমগ্র খানা সম্পর্কিত তথ্য |                                                                                 |                                                                                                                                                                      |                                                                                                                                                                                                                                                                     |       |         |      |         |      |           |  |  |  |                        |  |  |  |
|---------------------------------------|---------------------------------------------------------------------------------|----------------------------------------------------------------------------------------------------------------------------------------------------------------------|---------------------------------------------------------------------------------------------------------------------------------------------------------------------------------------------------------------------------------------------------------------------|-------|---------|------|---------|------|-----------|--|--|--|------------------------|--|--|--|
| 2.1                                   | খানাপ্রধান আয় কিভাবে পান?<br>এবং কত পান?                                       | <input type="checkbox"/> 1. দৈনিক<br><input type="checkbox"/> 2. সাপ্তাহিক আয় টাকায় _____<br><input type="checkbox"/> 3. মাসিক (2.3 এ যান)                         |                                                                                                                                                                                                                                                                     |       |         |      |         |      |           |  |  |  |                        |  |  |  |
| 2.2                                   | যদি আয় দৈনিক অথবা সাপ্তাহিক হয় তবে গত তিন মাসে খানাপ্রধান কতদিন কাজ করেছিলেন? | প্রথম মাস _____ দিন<br>দ্বিতীয় মাস _____ দিন<br>তৃতীয় মাস _____ দিন                                                                                                |                                                                                                                                                                                                                                                                     |       |         |      |         |      |           |  |  |  |                        |  |  |  |
| 2.3                                   | গত 12 মাসে খানাপ্রধানের আয়ের উৎসগুলি কি কি ছিল?<br>(একাধিক উত্তর হতে পারে)     | নং                                                                                                                                                                   | আয়ের উৎস                                                                                                                                                                                                                                                           | হ্যাঁ | না      |      |         |      |           |  |  |  |                        |  |  |  |
|                                       |                                                                                 | 1                                                                                                                                                                    | কৃষি (নিজস্ব জমি)                                                                                                                                                                                                                                                   | 1     | 2       |      |         |      |           |  |  |  |                        |  |  |  |
|                                       |                                                                                 | 2                                                                                                                                                                    | কৃষি (বর্গাচাষ)                                                                                                                                                                                                                                                     | 1     | 2       |      |         |      |           |  |  |  |                        |  |  |  |
|                                       |                                                                                 | 3                                                                                                                                                                    | বন্ধক/ কট/ পোষানি (দেওয়া নেওয়া)                                                                                                                                                                                                                                   | 1     | 2       |      |         |      |           |  |  |  |                        |  |  |  |
|                                       |                                                                                 | 4                                                                                                                                                                    | দিন মুজুর                                                                                                                                                                                                                                                           | 1     | 2       |      |         |      |           |  |  |  |                        |  |  |  |
|                                       |                                                                                 | 5                                                                                                                                                                    | মাছ ধরা / বিক্রয় করা                                                                                                                                                                                                                                               | 1     | 2       |      |         |      |           |  |  |  |                        |  |  |  |
|                                       |                                                                                 | 6                                                                                                                                                                    | গরু ছাগল/ মুরগী/ হাঁসের খামার                                                                                                                                                                                                                                       | 1     | 2       |      |         |      |           |  |  |  |                        |  |  |  |
|                                       |                                                                                 | 7                                                                                                                                                                    | হস্তশিল্প                                                                                                                                                                                                                                                           | 1     | 2       |      |         |      |           |  |  |  |                        |  |  |  |
|                                       |                                                                                 | 8                                                                                                                                                                    | দর্জি কাজ                                                                                                                                                                                                                                                           | 1     | 2       |      |         |      |           |  |  |  |                        |  |  |  |
|                                       |                                                                                 | 9                                                                                                                                                                    | ব্যবসা                                                                                                                                                                                                                                                              | 1     | 2       |      |         |      |           |  |  |  |                        |  |  |  |
|                                       |                                                                                 | 10                                                                                                                                                                   | চাকুরী                                                                                                                                                                                                                                                              | 1     | 2       |      |         |      |           |  |  |  |                        |  |  |  |
|                                       |                                                                                 | 11                                                                                                                                                                   | অবসর ভাতা                                                                                                                                                                                                                                                           | 1     | 2       |      |         |      |           |  |  |  |                        |  |  |  |
|                                       |                                                                                 | 12                                                                                                                                                                   | নগদ অর্থপ্রাপ্তী (অভ্যন্তরীণ)                                                                                                                                                                                                                                       | 1     | 2       |      |         |      |           |  |  |  |                        |  |  |  |
|                                       |                                                                                 | 13                                                                                                                                                                   | নগদ অর্থ প্রাপ্তী (বিদেশ হতে)                                                                                                                                                                                                                                       | 1     | 2       |      |         |      |           |  |  |  |                        |  |  |  |
|                                       |                                                                                 | 14                                                                                                                                                                   | কাজের বিনিময়ে খাদ্য                                                                                                                                                                                                                                                | 1     | 2       |      |         |      |           |  |  |  |                        |  |  |  |
|                                       |                                                                                 | 15                                                                                                                                                                   | ভিজিডি/ বয়স্ক ভাতা/ দুস্তঃ ভাতা                                                                                                                                                                                                                                    | 1     | 2       |      |         |      |           |  |  |  |                        |  |  |  |
|                                       |                                                                                 | 16                                                                                                                                                                   | বাড়ি/ দোকান ভাড়া                                                                                                                                                                                                                                                  | 1     | 2       |      |         |      |           |  |  |  |                        |  |  |  |
|                                       |                                                                                 | 17                                                                                                                                                                   | রিকশা/ভ্যান/অটো চালক                                                                                                                                                                                                                                                |       |         |      |         |      |           |  |  |  |                        |  |  |  |
| 18                                    | অন্যান্য (উল্লেখ করুন) _____                                                    | 1                                                                                                                                                                    | 2                                                                                                                                                                                                                                                                   |       |         |      |         |      |           |  |  |  |                        |  |  |  |
| 2.4                                   | উপরে উল্লেখিত(2.4) আয়ের উৎসগুলির মধ্যে প্রধান উৎসটি কি ছিল?                    | নং  __ __  (2.4 নং প্রশ্ন হতে শুধু ক্রমিক নং লিখুন)                                                                                                                  |                                                                                                                                                                                                                                                                     |       |         |      |         |      |           |  |  |  |                        |  |  |  |
| 2.5                                   | খানায় কতগুলি ঘর আছে?                                                           | সংখ্যা:  __                                                                                                                                                          |                                                                                                                                                                                                                                                                     |       |         |      |         |      |           |  |  |  |                        |  |  |  |
| 2.6                                   | প্রধান ঘর কি কি উপকরণ দ্বারা তৈরী (যাচাই করুন)                                  | 1. পাকা/ আধা পাকা<br>2. টিন<br>3. টিন এবং বাঁশ<br>4. টিন এবং অন্যান্য<br>5. বাঁশ এবং অন্যান্য<br>6. কাঁচা (মাটি)<br>7. কাঠ<br>8. সিরামিক/টাইলস<br>9. অন্যান্য        | <table border="1"> <thead> <tr> <th></th> <th>ছাদ</th> <th>দেওয়াল</th> <th>মেঝে</th> </tr> </thead> <tbody> <tr> <td>ক্রমিক নং</td> <td></td> <td></td> <td></td> </tr> <tr> <td>৪ (আট) হলে উল্লেখ করুন</td> <td></td> <td></td> <td></td> </tr> </tbody> </table> |       |         | ছাদ  | দেওয়াল | মেঝে | ক্রমিক নং |  |  |  | ৪ (আট) হলে উল্লেখ করুন |  |  |  |
|                                       |                                                                                 |                                                                                                                                                                      |                                                                                                                                                                                                                                                                     | ছাদ   | দেওয়াল | মেঝে |         |      |           |  |  |  |                        |  |  |  |
| ক্রমিক নং                             |                                                                                 |                                                                                                                                                                      |                                                                                                                                                                                                                                                                     |       |         |      |         |      |           |  |  |  |                        |  |  |  |
| ৪ (আট) হলে উল্লেখ করুন                |                                                                                 |                                                                                                                                                                      |                                                                                                                                                                                                                                                                     |       |         |      |         |      |           |  |  |  |                        |  |  |  |
| 2.7                                   | আপনাদের পরিবারের কতটুকু জমি আছে ?                                               | বসত ভিটা(পুকুর এবং ডোবা সহ):<br>কানি: _____ গণ্ডা: _____ কড়া: _____ = শতাংশ  __ __ __ __ <br>কৃষি জমি:<br>কানি: _____ গণ্ডা: _____ কড়া: _____ = শতাংশ  __ __ __ __ |                                                                                                                                                                                                                                                                     |       |         |      |         |      |           |  |  |  |                        |  |  |  |

|      |                                                                                |            |                             |       |    |
|------|--------------------------------------------------------------------------------|------------|-----------------------------|-------|----|
| 2.8  | উল্লেখিত দ্রব্যসামগ্রী/ সম্পদগুলি কি আপনার খানায় আছে? (একাধিক উত্তর হতে পারে) | <b>No.</b> | পণ্য/ দ্রব্যসামগ্রী         | হ্যাঁ | না |
|      |                                                                                | 1          | গরু/ ছাগল                   | 1     | 2  |
|      |                                                                                | 2          | মাছ ধরার জাল                | 1     | 2  |
|      |                                                                                | 3          | হাঁস / মুরগী                | 1     | 2  |
|      |                                                                                | 4          | মুদি দোকান                  | 1     | 2  |
|      |                                                                                | 5          | রিম্মা / ভ্যান / অটো রিম্মা | 1     | 2  |
|      |                                                                                | 6          | কৃষি যন্ত্রপাতি             | 1     | 2  |
|      |                                                                                | 7          | নৌকা                        | 1     | 2  |
|      |                                                                                | 8          | খাট / চৌকি                  | 1     | 2  |
|      |                                                                                | 9          | কাথা / কঞ্চল                | 1     | 2  |
|      |                                                                                | 10         | তোষক                        | 1     | 2  |
|      |                                                                                | 11         | হারিকেন                     | 1     | 2  |
|      |                                                                                | 12         | চেয়ার / টেবিল              | 1     | 2  |
|      |                                                                                | 13         | ডাইনিং টেবিল                | 1     | 2  |
|      |                                                                                | 14         | আলমারি / শোকেস              | 1     | 2  |
|      |                                                                                | 15         | শোফা সেট                    | 1     | 2  |
|      |                                                                                | 16         | টেলিভিশন                    | 1     | 2  |
|      |                                                                                | 17         | রেডিও / টেপ রেকর্ডার        | 1     | 2  |
|      |                                                                                | 18         | ঘড়ি / দেওয়াল ঘড়ি         | 1     | 2  |
|      |                                                                                | 19         | টেলিফোন / মোবাইল ফোন        | 1     | 2  |
|      |                                                                                | 20         | বাইসাইকেল                   | 1     | 2  |
|      |                                                                                | 21         | মোটর সাইকেল                 | 1     | 2  |
|      |                                                                                | 22         | ফ্রিজ                       | 1     | 2  |
|      |                                                                                | 23         | ফ্যান                       | 1     | 2  |
|      |                                                                                | 24         | সেলাই মেশিন                 | 1     | 2  |
| 25   | অন্যান্য (উল্লেখ করুন) _____                                                   | 1          | 2                           |       |    |
| 2.9  | আপনার কোন ধরনের পায়খানা ব্যবহার করেন?                                         | <b>নং</b>  | পায়খানার ধরন               | হ্যাঁ | না |
|      |                                                                                | 1          | সেনিটারী                    | 1     | 2  |
|      |                                                                                | 2          | পীট পায়খানা                | 1     | 2  |
|      |                                                                                | 3          | পাকা পায়খানা               | 1     | 2  |
|      |                                                                                | 4          | কাঁচা পায়খানা              | 1     | 2  |
| 5    | অন্যান্য (উল্লেখ করুন) _____                                                   | 1          | 2                           |       |    |
| 2.10 | আপনাদের খাবার পানির মূল উৎস কি?                                                | <b>নং</b>  | উৎসের ধরন                   | হ্যাঁ | না |
|      |                                                                                | 1          | টিউবওয়েল                   | 1     | 2  |
|      |                                                                                | 2          | পুকুর/নদী/ডোবা / নালা       | 1     | 2  |
|      |                                                                                | 3          | বিশুদ্ধকৃত/ফিল্টার পানি     | 1     | 2  |
|      |                                                                                | 4          | বৃষ্টির পানি                | 1     | 2  |
|      |                                                                                | 5          | পাইপ/ ট্যাঁপ/ সাপ্লাই পানি  | 1     | 2  |
| 6    | অন্যান্য (উল্লেখ করুন) _____                                                   | 1          | 2                           |       |    |



## Section 4: খানার ব্যয় সংক্রান্ত তথ্য

## Part A: খাদ্য (সাপ্তাহিক ব্যয়)

| ক্রঃ নং                                  | খাদ্যের ধরন                | ভোগের/খাওয়ার পরিমাণ | ব্যয় (বাজার দর)টাকা অনুযায়ী | উৎস<br>(1=ক্রয়কৃত,<br>2=কাজের বিনিময়ে,<br>3=নিজে উৎপাদিত, 4=উপহার) |
|------------------------------------------|----------------------------|----------------------|-------------------------------|----------------------------------------------------------------------|
| <b>4.1 গত এক সপ্তাহে খাদ্য শস্য</b>      |                            |                      |                               |                                                                      |
| 1                                        | চাল (কেজি)                 |                      |                               |                                                                      |
| 2                                        | আটা(কেজি)                  |                      |                               |                                                                      |
| 3                                        | ময়দা (কেজি)               |                      |                               |                                                                      |
| 4                                        | চিড়া/মুড়ি (কেজি)         |                      |                               |                                                                      |
| <b>4.2 গত এক সপ্তাহে ডাল জাতীয় শস্য</b> |                            |                      |                               |                                                                      |
| 5                                        | মশুর ডাল (কেজি)            |                      |                               |                                                                      |
| 6                                        | ছোলার ডাল (কেজি)           |                      |                               |                                                                      |
| 7                                        | মাস কালাই (কেজি)           |                      |                               |                                                                      |
| 8                                        | খেসারী (কেজি)              |                      |                               |                                                                      |
| 9                                        | মুগ (কেজি)                 |                      |                               |                                                                      |
| 10                                       | বুট (কেজি)                 |                      |                               |                                                                      |
| 11                                       | এ্যাংকর (কেজি)             |                      |                               |                                                                      |
| <b>4.3 গত এক সপ্তাহে ভোজ্য তৈল</b>       |                            |                      |                               |                                                                      |
| 12                                       | সয়াবিন (কেজি)             |                      |                               |                                                                      |
| 13                                       | সরিষা (কেজি)               |                      |                               |                                                                      |
| 14                                       | ডালডা (কেজি)               |                      |                               |                                                                      |
| 15                                       | ঘি (কেজি)                  |                      |                               |                                                                      |
| 16                                       | পাম অয়েল (কেজি)           |                      |                               |                                                                      |
| 17                                       | অন্যান্য (কেজি) _____      |                      |                               |                                                                      |
| <b>4.4 এক সপ্তাহে শাক/ সবজি</b>          |                            |                      |                               |                                                                      |
| 18                                       | লাল শাক (কেজি)             |                      |                               |                                                                      |
| 19                                       | পুই শাক (কেজি)             |                      |                               |                                                                      |
| 20                                       | পালং শাক (কেজি)            |                      |                               |                                                                      |
| 21                                       | কলমি শাক (কেজি)            |                      |                               |                                                                      |
| 22                                       | অন্যান্য শাক _____ (কেজি)  |                      |                               |                                                                      |
| 23                                       | অন্যান্য শাক _____ (কেজি)  |                      |                               |                                                                      |
| 24                                       | অন্যান্য শাক _____ (কেজি)  |                      |                               |                                                                      |
| 25                                       | আলু (কেজি)                 |                      |                               |                                                                      |
| 26                                       | পটল (কেজি)                 |                      |                               |                                                                      |
| 27                                       | করলা                       |                      |                               |                                                                      |
| 28                                       | ফুলকপি                     |                      |                               |                                                                      |
| 29                                       | বাধাকপি                    |                      |                               |                                                                      |
| 30                                       | বেগুন (কেজি)               |                      |                               |                                                                      |
| 31                                       | কচু                        |                      |                               |                                                                      |
| 32                                       | লাউ                        |                      |                               |                                                                      |
| 33                                       | টমেটো (কেজি)               |                      |                               |                                                                      |
| 34                                       | কাঁচা পেপে (কেজি)          |                      |                               |                                                                      |
| 35                                       | কাঁচা কলা (কেজি)           |                      |                               |                                                                      |
| 36                                       | কাঁচা মরিচ (কেজি)          |                      |                               |                                                                      |
| 37                                       | পেয়াজ (কেজি)              |                      |                               |                                                                      |
| 38                                       | রসুন (কেজি)                |                      |                               |                                                                      |
| 39                                       | আদা (কেজি)                 |                      |                               |                                                                      |
| 40                                       | অন্যান্য সবজি _____ (কেজি) |                      |                               |                                                                      |
| 41                                       | অন্যান্য সবজি _____ (কেজি) |                      |                               |                                                                      |
| 42                                       | অন্যান্য সবজি _____ (কেজি) |                      |                               |                                                                      |

## Part B: খাদ্য (মাসিক ব্যয়)

|                                            |                             |  |  |  |
|--------------------------------------------|-----------------------------|--|--|--|
| <b>4.5 গত এক মাসে মসলা</b>                 |                             |  |  |  |
| 1                                          | শুকনা মরিচ (গ্রাম)          |  |  |  |
| 2                                          | হলুদ (গ্রাম)                |  |  |  |
| 3                                          | জিরা (গ্রাম)                |  |  |  |
| 4                                          | দারুচিনি (গ্রাম)            |  |  |  |
| 5                                          | এলাচি (গ্রাম)               |  |  |  |
| 6                                          | অন্যান্য মসলা _____ (গ্রাম) |  |  |  |
| 7                                          | অন্যান্য মসলা _____ (গ্রাম) |  |  |  |
| 8                                          | অন্যান্য মসলা _____ (গ্রাম) |  |  |  |
| <b>4.6 গত এক মাসে মাছ, মাংস, ডিম ও দুধ</b> |                             |  |  |  |
| 9                                          | বড় মাছ (কেজি)              |  |  |  |
| 10                                         | ছোট মাছ (কেজি)              |  |  |  |
| 11                                         | শুটকি মাছ (কেজি)            |  |  |  |
| 12                                         | গরুর মাংস (কেজি)            |  |  |  |
| 13                                         | মহিষের মাংস (কেজি)          |  |  |  |
| 14                                         | দেশী মুরগীর মাংস (কেজি)     |  |  |  |

| ক্রঃ নং                                               | খাদ্যের ধরন (একক)                                    | ভোগের/খাওয়ার পরিমাণ | ব্যয় (বাজার দর)টাকা অনুযায়ী | উৎস<br>(1=ক্রয়কৃত,<br>2=কাজের বিনিময়ে,<br>3=নিজে উৎপাদিত, 4=উপহার) |
|-------------------------------------------------------|------------------------------------------------------|----------------------|-------------------------------|----------------------------------------------------------------------|
| 15                                                    | ফার্ম মুরগীর মাংস (কেজি)                             |                      |                               |                                                                      |
| 16                                                    | হাঁসের মাংস (কেজি)                                   |                      |                               |                                                                      |
| 17                                                    | খাসীর মাংস (কেজি)                                    |                      |                               |                                                                      |
| 18                                                    | ডিম (সংখ্যা)                                         |                      |                               |                                                                      |
| 19                                                    | দুধ (কেজি)                                           |                      |                               |                                                                      |
| 20                                                    | অন্যান্য আমিষ জাতীয় খাবার _____ (কেজি)              |                      |                               |                                                                      |
| 21                                                    | অন্যান্য আমিষ জাতীয় খাবার _____ (কেজি)              |                      |                               |                                                                      |
| 22                                                    | অন্যান্য আমিষ জাতীয় খাবার _____ (কেজি)              |                      |                               |                                                                      |
| <b>4.7 গত এক মাসে ফল</b>                              |                                                      |                      |                               |                                                                      |
| 23                                                    | কলা (সংখ্যা)                                         |                      |                               |                                                                      |
| 24                                                    | বড়ই(কেজি)                                           |                      |                               |                                                                      |
| 25                                                    | জলপাই (কেজি)                                         |                      |                               |                                                                      |
| 26                                                    | পাকা পেপে (কেজি)                                     |                      |                               |                                                                      |
| 27                                                    | আম (কেজি)                                            |                      |                               |                                                                      |
| 28                                                    | কাঁঠাল (সংখ্যা)                                      |                      |                               |                                                                      |
| 29                                                    | জাম (কেজি)                                           |                      |                               |                                                                      |
| 30                                                    | আপেল (কেজি)                                          |                      |                               |                                                                      |
| 31                                                    | কমলা (কেজি)                                          |                      |                               |                                                                      |
| 32                                                    | আংগুর (কেজি)                                         |                      |                               |                                                                      |
| 33                                                    | অন্যান্য ফল _____ (কেজি)                             |                      |                               |                                                                      |
| 34                                                    | অন্যান্য ফল _____ (কেজি)                             |                      |                               |                                                                      |
| 35                                                    | অন্যান্য ফল _____ (কেজি)                             |                      |                               |                                                                      |
| <b>4.8 গত এক মাসে অন্যান্য খাবার</b>                  |                                                      |                      |                               |                                                                      |
| 36                                                    | চিনি (কেজি)                                          |                      |                               |                                                                      |
| 37                                                    | গুঁড় (কেজি)                                         |                      |                               |                                                                      |
| 38                                                    | গুঁড়ো দুধ (কেজি)                                    |                      |                               |                                                                      |
| 39                                                    | লবন (কেজি)                                           |                      |                               |                                                                      |
| 40                                                    | নুডুলস (কেজি)                                        |                      |                               |                                                                      |
| 41                                                    | সুজি/সেমাই (কেজি)                                    |                      |                               |                                                                      |
| 42                                                    | কোমল পানীয় (লিটার)                                  |                      |                               |                                                                      |
| 43                                                    | মিষ্টি জাতীয় খাদ্য (কেজি)                           |                      |                               |                                                                      |
| 44                                                    | শিশু খাদ্য _____ (কেজি)                              |                      |                               |                                                                      |
| 45                                                    | চা পাতা (কেজি)                                       |                      |                               |                                                                      |
| 46                                                    | বিস্কুট (কেজি)                                       |                      |                               |                                                                      |
| 47                                                    | চানাচুর (কেজি)                                       |                      |                               |                                                                      |
| 48                                                    | অন্যান্য _____ (কেজি)                                |                      |                               |                                                                      |
| 49                                                    | অন্যান্য _____ (কেজি)                                |                      |                               |                                                                      |
| 50                                                    | অন্যান্য _____ (কেজি)                                |                      |                               |                                                                      |
| <b>Part C: তামাকজাত দ্রব্য (সপ্তাহিক ব্যয়)</b>       |                                                      |                      |                               |                                                                      |
| <b>4.9 গত এক সপ্তাহে তামাকজাত দ্রব্য ভোগের পরিমাণ</b> |                                                      |                      |                               |                                                                      |
| 1                                                     | পান (সংখ্যা)                                         |                      |                               |                                                                      |
| 2                                                     | সুপারী (সংখ্যা)                                      |                      |                               |                                                                      |
| 3                                                     | জর্দা (কোঁটা)                                        |                      |                               |                                                                      |
| 4                                                     | তামাক (সংখ্যা)                                       |                      |                               |                                                                      |
| 5                                                     | গুল (কোঁটা)                                          |                      |                               |                                                                      |
| 6                                                     | বিড়ি (প্যাকেট)                                      |                      |                               |                                                                      |
| 7                                                     | সিগারেট (প্যাকেট)                                    |                      |                               |                                                                      |
| 8                                                     | অন্যান্য _____ (কেজি)                                |                      |                               |                                                                      |
| 9                                                     | অন্যান্য _____ (কেজি)                                |                      |                               |                                                                      |
| 10                                                    | অন্যান্য _____ (কেজি)                                |                      |                               |                                                                      |
| <b>Part D: খাদ্য বাদে (মাসিক ব্যয়)</b>               |                                                      |                      |                               |                                                                      |
| কঃ 1                                                  |                                                      | কঃ 2                 |                               | কঃ 3                                                                 |
| ক্রঃ নং                                               |                                                      | খাত                  |                               | খরচের পরিমাণ (মাসিক)                                                 |
| <b>4.10 গত এক মাসে খাদ্য বাদে ব্যয়</b>               |                                                      |                      |                               |                                                                      |
| 1                                                     | ভাড়া                                                |                      |                               |                                                                      |
| 2                                                     | বিদ্যুত বিল/ সৌর বিদ্যুৎ                             |                      |                               |                                                                      |
| 3                                                     | গ্যাস বিল                                            |                      |                               |                                                                      |
| 4                                                     | জ্বালানি কাঠ                                         |                      |                               |                                                                      |
| 5                                                     | জ্বালানি তেল (কেরোসিন, পেট্রোল..)                    |                      |                               |                                                                      |
| 6                                                     | পরিবহন                                               |                      |                               |                                                                      |
| 7                                                     | স্বাস্থ্য                                            |                      |                               |                                                                      |
| 8                                                     | শিক্ষা (স্কুলের বেতন, কোচিং, প্রাইভেট টিচার ইত্যাদি) |                      |                               |                                                                      |

| কঃ 1    | কঃ 2                                                               | কঃ 3                 |
|---------|--------------------------------------------------------------------|----------------------|
| ক্র: নং | খাত                                                                | খরচের পরিমাণ (মাসিক) |
| 9       | খাতা/কলম/বই/ অন্যান্য শিক্ষাউপকরণ                                  |                      |
| 10      | যোগাযোগ ব্যয় (মোবাইল, টেলিফোন ইত্যাদি)                            |                      |
| 11      | ডিশ বিল/ইন্টারনেট ব্যয়                                            |                      |
| 12      | কসমেটিক ব্যয় (ক্রিম, পাউডার, মেকাপ ইত্যাদি)                       |                      |
| 13      | চুলে ব্যবহারের তেল (নাড়িকেল তেল)                                  |                      |
| 14      | পরিষ্কার ও পরিচ্ছন্নতা ব্যয় (সাবান, ডিটারজেন্ট, শ্যাম্পু ইত্যাদি) |                      |
| 15      | লব্ধি                                                              |                      |
| 16      | অর্থের বহির্গমন (যেকোনো প্রকার)                                    |                      |
| 17      | সমিতির কিস্তি/ফুড্রাশনের কিস্তি                                    |                      |
| 18      | সেলুন/পার্লার                                                      |                      |
| 19      | অন্যান্য (নির্দিষ্ট করে বলুন)                                      |                      |

**Part C: খাদ্য বাদে (বার্ষিক ব্যয়)**

**4.11** গত এক বছরে খাদ্য বাদে ব্যয়

|    |                                 |  |
|----|---------------------------------|--|
| 1  | পোশাক                           |  |
| 2  | জুতা                            |  |
| 3  | লেপ/তোষক/বালিশ/চাদর/বিছানা      |  |
| 4  | বিনোদন / ধর্মীয় অনুষ্ঠান       |  |
| 5  | গৃহ নির্মাণ/গৃহ সংস্কার         |  |
| 6  | আসবাবপত্র                       |  |
| 7  | ইন্সুরেন্স প্রিমিয়াম           |  |
| 8  | গৃহপরিচালক / গৃহপরিচারিকার বেতন |  |
| 9  | উপহার প্রদান                    |  |
| 10 | দান/ফিতরা                       |  |
| 11 | ভ্রমণ                           |  |
| 12 | অন্যান্য(নির্দিষ্ট করে বলুন)    |  |

**Section 5: ল্যাম্পের সেবা গ্রহন সংক্রান্ত তথ্য**

**5.1** বিগত তিনমাসে ল্যাম্পের সেবা গ্রহনের পরিমাণ

| সেবা | সেবা গ্রহনকারীর কোড              | সেবার পরিমাণ | সেবা গ্রহনে মোট ব্যয় | একই সেবা অন্যত্র গ্রহনে ব্যয়/বাজার মূল্য |                                    |
|------|----------------------------------|--------------|-----------------------|-------------------------------------------|------------------------------------|
| 1    | এমবিবিএস ডাক্তারের পরামর্শ       |              |                       |                                           |                                    |
| 2    | স্যাটেলাইট ক্লিনিকে সেবা         |              |                       |                                           |                                    |
| 3    | হেল্থ ক্যাম্পে সেবা              |              |                       |                                           |                                    |
| 4    | স্পেসিয়ালিস্ট ডাক্তারের পরামর্শ |              |                       |                                           |                                    |
| 5    | ডায়াগনস্টিক টেস্ট               |              |                       |                                           |                                    |
| 6    | হসপাতালে চিকিৎসা গ্রহনে ভর্তুকী  |              |                       |                                           |                                    |
| 7    | ঔষধে ভর্তুকী                     |              |                       |                                           |                                    |
| 8    | অন্যান্য স্বাস্থ্যসেবা_____      |              |                       |                                           |                                    |
| 9    | কম্পিউটার প্রশিক্ষণ              |              |                       |                                           |                                    |
| 10.  | ল্যাম্প স্টোর সেবা               | পন্য         | পরিমাণ                | সেবা গ্রহনে মোট ব্যয়                     | একই পন্য অন্যত্র মূল্য/বাজার মূল্য |
|      |                                  | চাল          |                       |                                           |                                    |
|      |                                  | ডাল          |                       |                                           |                                    |
|      |                                  | ময়দা        |                       |                                           |                                    |
|      |                                  | চিনি         |                       |                                           |                                    |
|      | সয়াবিন                          |              |                       |                                           |                                    |

**5.2** ল্যাম্পের সেবা গ্রহন না করে থাকলে তার কারণ

| 1. সেবা               | <input type="checkbox"/> সাহ্যসেবা গ্রহন করেননি    | <input type="checkbox"/> পরিবারের কোন সদস্য কম্পিউটার প্রশিক্ষণ গ্রহন করেননি | <input type="checkbox"/> ল্যাম্প স্টোর থেকে পন্য |
|-----------------------|----------------------------------------------------|------------------------------------------------------------------------------|--------------------------------------------------|
| 2. গ্রহন না করার কারণ | 1. পরিবারের কোনো সদস্য অসুস্থ ছিলনা                | 1. পরিবারের কোনো প্রশিক্ষনের যোগ্য শিশু কিশোর নেই                            | 1. আপনার এলাকায় ল্যাম্প স্টোর নেই               |
|                       | 2. অসুস্থ ছিল কিন্তু জটিল কোনো সমস্যা ছিল না       | 2. আপনার পরিবারের কোনো সদস্য আগ্রহী নয়                                      | 2. ল্যাম্প স্টোরে বাকীতে পন্য দেয়া হয়না        |
|                       | 3. ল্যাম্পে চিকিৎসার খরচ অত্যধিক                   | 3. প্রশিক্ষনের খরচ অত্যধিক                                                   | 3. অন্য স্টোরে বাকীতে পন্য কিনেন                 |
|                       | 4. ল্যাম্পে চিকিৎসা গ্রহনের পর্যাপ্ত অর্থ ছিলনা    | 4. ল্যাম্প প্রশিক্ষন গ্রহনের পর্যাপ্ত অর্থ ছিলনা                             | 4. পরিচিত স্টোর হতে পন্য কিনেন                   |
|                       | 5. ল্যাম্প স্বাস্থ্যকেন্দ্রের দূরত্ব খুব বেশি      | 5. প্রশিক্ষন সেবা সম্পর্কে অবহিত ছিলেননা                                     | 5. ল্যাম্প স্টোরের দূরত্ব খুব বেশি               |
|                       | 6. ল্যাম্প স্বাস্থ্যকেন্দ্রে নেয়ার জন্য কে ছিল না | 6. প্রশিক্ষন পরবর্তী উপযুক্ত সময়ে নিবেন                                     | 6. ল্যাম্প স্টোরে সব পন্য নেই                    |
|                       | 7. ল্যাম্প স্বাস্থ্যকেন্দ্রের অবস্থান জানেননা      | 7. ল্যাম্প কেন্দ্রের দূরত্ব খুব বেশি                                         | 7. ল্যাম্প স্টোরের অবস্থান জানেননা               |
|                       | 8. ল্যাম্প স্বাস্থ্যসেবার মান ভাল না               | 8. ল্যাম্প প্রশিক্ষনের মান ভাল না                                            | 8. ল্যাম্প স্টোরের পন্যের মান ভালো না            |
|                       | 9. অন্যান্য (উল্লেখ করুন _____)                    | 9. অন্যান্য (উল্লেখ করুন _____)                                              | 9. অন্যান্য (উল্লেখ করুন _____)                  |





| Section 7: খানার উপর ল্যাম্প সদস্যের অসুস্থতার প্রভাব<br>(যদি ল্যাম্প সদস্য অসুস্থতায় না ভোগেন ধন্যবাদ জানিয়ে সাক্ষাৎকার শেষ করুন)                                     |                                                                                                                                   |                                                                                                                                                                 |
|--------------------------------------------------------------------------------------------------------------------------------------------------------------------------|-----------------------------------------------------------------------------------------------------------------------------------|-----------------------------------------------------------------------------------------------------------------------------------------------------------------|
| Part 7A: অসুস্থতা থাকাকালে উপস্থিতি                                                                                                                                      |                                                                                                                                   |                                                                                                                                                                 |
| 1                                                                                                                                                                        | ল্যাম্প সদস্য বিগত 3 মাসের মধ্যে অসুস্থ থাকাকালে কতদিন কাজে উপস্থিত ছিলেন?<br>(প্রযোজ্য না হলে "NA" লিখুন)                        |                                                                                                                                                                 |
| Part 7B: কাজ থেকে অসুস্থতার কারণে ড্রপ-আউট                                                                                                                               |                                                                                                                                   |                                                                                                                                                                 |
| 2                                                                                                                                                                        | ল্যাম্প সদস্য গত 3 মাসের মধ্যে অসুস্থতার কারণে স্থায়ীভাবে/ সাময়িক ভাবে কোনো কাজ ছেড়েছেন কি?                                    | <input type="checkbox"/> হ্যাঁ (1)<br><input type="checkbox"/> না (2)<br><input type="checkbox"/> প্রযোজ্য নয় (99)                                             |
| Part 7C: খাদ্য নিরাপত্তার উপর অসুস্থতার প্রভাব                                                                                                                           |                                                                                                                                   |                                                                                                                                                                 |
| 3                                                                                                                                                                        | গত 3 মাসের মধ্যে ল্যাম্প সদস্যের অসুস্থতার খরচের জন্য আপনার পরিবারের খাদ্য গ্রহণ ও অন্যান্য খরচ কমাতে হয়েছিল কি?                 | <input type="checkbox"/> হ্যাঁ (1)<br><input type="checkbox"/> না (2)<br><input type="checkbox"/> প্রযোজ্য নয় (99)                                             |
| Part 7D: অসুস্থতার কারণে শিশুর স্কুল থেকে ড্রপ-আউট                                                                                                                       |                                                                                                                                   |                                                                                                                                                                 |
| 4                                                                                                                                                                        | গত 3 মাসের মধ্যে ল্যাম্প সদস্যের অসুস্থতার কারণে আপনার পরিবারের কোনো শিশু সদস্যদের স্থায়ীভাবে স্কুল ছাড়তে হয়েছিল কি?           | <input type="checkbox"/> হ্যাঁ (1)<br><input type="checkbox"/> না (2)<br><input type="checkbox"/> প্রযোজ্য নয় (99)                                             |
| Part 7E: অসুস্থতার কারণে শিশু শ্রম                                                                                                                                       |                                                                                                                                   |                                                                                                                                                                 |
| 5                                                                                                                                                                        | গত 3 মাসের মধ্যে ল্যাম্প সদস্যের অসুস্থতার কারণে আপনার পরিবারের কোনো শিশু সদস্যদের কাজে যোগ দিতে হয়েছিল কি?                      | <input type="checkbox"/> হ্যাঁ (1)<br><input type="checkbox"/> না (2)<br><input type="checkbox"/> প্রযোজ্য নয় (99)                                             |
| Section 8: ল্যাম্প সদস্যের স্বাস্থ্যসেবায় সন্তুষ্টি<br>(সাক্ষাৎপ্রদানকারী ল্যাম্প সদস্য হলে / ল্যাম্প সদস্যের স্বাস্থ্যসেবা গ্রহণের সময় সংগে থাকলে এই প্রশ্নগুলি করুন) |                                                                                                                                   |                                                                                                                                                                 |
| 1                                                                                                                                                                        | চিকিৎসাকেন্দ্রের ডাক্তারের ব্যবহার সম্পর্কে আপনার মতামত কি?                                                                       | 1. খুব খারাপ<br>2. খারাপ<br>3. মোটামুটি<br>4. ভালো<br>5. খুব ভালো                                                                                               |
| 2                                                                                                                                                                        | ডাক্তারের নির্দেশিত ঔষধগুলো কখন কিভাবে খেতে হবে এবং অন্যান্য উপদেশগুলো কিভাবে পালন করতে হবে সেটা কি আপনাকে বুঝিয়ে দেয়া হয়েছিল? | 1. একদমই ব্যাখ্যা করা হয়নি<br>2. আংশিক ব্যাখ্যা করা হয়েছে<br>3. মোটামুটি ব্যাখ্যা করা হয়েছে<br>4. ব্যাখ্যা করা হয়েছে<br>5. সম্পূর্ণভাবে ব্যাখ্যা করা হয়েছে |
| 3                                                                                                                                                                        | আপনাকে যে টেস্টগুলো করতে দেয়া হয়েছে সেগুলো কেন করা দরকার, সেটা কি আপনার কাছে ব্যাখ্যা করে বলা হয়েছিল?                          | 1. একদমই ব্যাখ্যা করা হয়নি<br>2. আংশিক ব্যাখ্যা করা হয়েছে<br>3. মোটামুটি ব্যাখ্যা করা হয়েছে<br>4. ব্যাখ্যা করা হয়েছে<br>5. সম্পূর্ণভাবে ব্যাখ্যা করা হয়েছে |
| 4                                                                                                                                                                        | চিকিৎসাকেন্দ্রের ডাক্তারবাদে অন্যান্য স্টাফের ব্যবহার সম্পর্কে আপনার মতামত কি?                                                    | 1. খুব খারাপ<br>2. খারাপ<br>3. মোটামুটি<br>4. ভালো<br>5. খুব ভালো                                                                                               |
| 5                                                                                                                                                                        | অভ্যর্থনা কক্ষ, টয়লেট এবং অন্যান্য উপকরণসমূহ পরিষ্কার পরিচ্ছন্ন ছিল কি?                                                          | 1. খুব অপরিচ্ছন্ন ছিল<br>2. অপরিচ্ছন্ন ছিল<br>3. মোটামুটি পরিচ্ছন্ন ছিল<br>4. পরিচ্ছন্ন ছিল<br>5. খুব পরিচ্ছন্ন ছিল                                             |
| 6                                                                                                                                                                        | চিকিৎসাকেন্দ্রের সার্বিক সেবা প্রদান সম্পর্কে আপনার অনুভূতি কি?                                                                   | 1. খুব খারাপ<br>2. খারাপ<br>3. মোটামুটি<br>4. ভালো<br>5. খুব ভালো                                                                                               |

আপনার মূল্যবান সময় দেয়ার জন্য আপনাকে ধন্যবাদ
